# Supplementary material
Source: PubMed Central journal article supplement (PMC2615160)
Supplement: supp_2.1-2.84_000851FigS1.pdf [file supp_2.1-2.84_000851FigS1.pdf]

Human 1 MGGCAGSRRRFSDSSEGEETVPEPRLPLLDHQGAHWKNAVGFWILGLCENNFSYVVMLSAAHDIILSHKRTSG  
 Mouse 1 MGSSAGSWRRLEDSEREETDSEPQAPRLDSRSLVWKNNAVGFWILGLCENNFSYVVMLSAAHDIILKQEQASG  
 D.rerio 1 -----MDRSVNSGTASTSDTEGRCQRWRNCFVAFWILGLCENNFSYVVMLSAAHDIILKQEQSQN  
 D.melan 1 MTATKQQEAEAEHDPQVVVTPGDASRSRQRDLWRDLTSYWILGLCENNYGYVVMLSAAHDIILKQFNPN  
 S.pombe 1 -----MIKLRLTKDAKVGCCFLIFGLLNNLLYVIILSAALDLVGAN-----  
 ^

Human 71 NQSHVDPGP----TPIPHNSSSRFDCNSVSTAAVLLADILPTLVIKLLAPLIG-IHLLPYSPRVLVSGICA  
 Mouse 71 NQSHVEPGR----TPTPHNSSSRFDCNSISTAAVLLADILPTLVIKLLAPLIG-IHLLPYSPRVLVSGVCS  
 D.rerio 58 TTAPSPAPNGTNIIEFRNSSNSSRYDCNPVSTAAVLLADILPTLLIKLTAPFY-IHKVPYGFRLVLCFFTA  
 D.melan 71 ESEESSGR-----NCHLVSTGATLLADVLPSLFLVKILMPFF-PFWN--FRIALAVAFS  
 S.pombe 42 -----VSKGVVLLSNIVPSLACKLSASILHVHKFKFAKRIIGFCVFM  
 \*

Human 136 AGSFVLVAFSHSVGTSICGVVFASISSGLGEVTFSLSTAFYPRAVISWSSSGTGGAGLLGALSYLEGLTQA  
 Mouse 136 AGSFVLVAFSQSVGLSLCGVVLASISSGLGEVTFSLSTAFYPSAVISWSSSGTGGAGLLGSLSYLEGLTQA  
 D.rerio 127 VVSFLMVFSSTISMSIIGVIFASVSSGLGELSFSLSVFFSSDVLISGWGSGTGAAGVAGALLYSALTQA  
 D.melan 123 AAGFLLVGFANAEMALLGVIIITSASSGIGETTFLAYSSRYNKNVISTWSSSGTGGAGVIGSLSYASLRSL  
 S.pombe 84 ILGMQWIAWSSSVPSKMLGVSLAAISSFGEISFLHLSRYHSVSLPCWSSSGTGLAGLFGASSYLEVMTW  
 \* \* \*

Human 206 G-LSPQQTLLSMLGIPALLIASYFLLITSPEAQDPGGEEEAESAARQPLIRTEAPEKPGSSSS-----  
 Mouse 206 G-LSPQHTLLSMLGIPVILLIASYFLLITSPEPWDPPGGENEAEETAARQPLIGTETPEKPGASWD-----  
 D.rerio 197 G-LTPQVTLWIMLVVPVILAVSYFVLLVFPHSFPQWRCPEVVSQSLSRGLNSEERRALIEEDIDTDEDSEP  
 D.melan 193 D-FSPRDTMLVMLIFPAIEAFWLLLRBPQ--VDILPVTIVESTEVLLSDEKELVG-----  
 S.pombe 154 FNFSVRSTLIISFPLIFLLIMYFFVLPESSESTSPSINNNYTPIESIDLDRAGHVSFNFN-----  
 \*

Human 269 -----LSLRERWTVFKGLLWYIVPLVVVYFAEYFINOGLFELLFFWNT---SLSHAQOYRWYQ  
 Mouse 269 -----LSLQERWTVFKGLLWYIIPLVLVYFAEYFINOGLFELLFFRNT---SLSHAHEYRWYQ  
 D.rerio 266 ALEDQDDKHIGPLTFTEKKYIIKGLLKFIFPLALVYFAEYFINOGLMELLYFPDS---RLSHAEOYRWYQ  
 D.melan 247 -----FKEKLFYIKHLFKYMLPLCLVYFFFEYFINOGLFELVYFEDI---FLDKDSOYRWLN  
 S.pombe 214 -----SLKQTFIFMQPYLLSHMFPQFLVYFSEYTTINIGVAPTLLFPPEKAGFSSFRDFYPTYQ  
 \*

Human 324 MLYQAGVFASRSSLRCCRIRFTWALALLQCLINLVFLLADVWEGFLPSIYLVFIILILEGLLGGAAVNTF  
 Mouse 324 MLYQAGVFASRSSLQCCRIRFTWVLAALLQSINLALLADVCLNLFPSIYLVFIILILEGLLGGAAVNTF  
 D.rerio 333 TVYQIGVFSRSTSLFCFKIRKIFLMSLLQCANAVLLVFVAVYQFLPNISVVFVIAFAEGLLGGAAVNTF  
 D.melan 300 VDYQIGVFISRSSVNLFQDKIWLMSIFQFVNVVYFLEVIWVYTPSIWVFAIVLWEGLLGGGAVNTF  
 S.pombe 272 TVYQIGVFLSRSSISFFTVPYLRTLAITQFIILLFTILQSALYLTSSYHFVLFVLEGLLGGTVVNVY  
 \* \*

Human 394 HNIALETSDEHREFAMAATCISDTLGISLSGLLALPLHDFLCQLS-----  
 Mouse 394 HNIALETSDKHREFAMEAACISDTLGISLSGVLALPLHDFLCHLP-----  
 D.rerio 403 FFIREESVEREREFAMATATVGDLSGIAFSAAAAFVHHYFCSL-----  
 D.melan 370 YRMSKEISPERQQFAMAMVQSDSYGIALAGFLAIPVHNAICGLPAAARSL-----  
 S.pombe 342 HSLQTTESQ-RELAISTVGSDDSSGIFLASLVSLFILEPSLCHFQADRGRDWCALT  
 \* ^ ^
